# Supplementary material for: Optimization of Layered Dissolving Microneedle for Sustained Drug Delivery Using Heat-Melted Poly(Lactic-Co-glycolic Acid)
Source: MDPI journal article supplement (doi:10.3390/pharmaceutics13071058), 2021-07-10
Supplement: s1 [file s1]

## Supplementary Materials: Optimization of Layered Dissolving Microneedle for Sustained Drug Delivery using Heat-melted Poly(lactic-co-glycolic acid)

Chisong Lee, Jinkyung Kim, Daniel Junmin Um, Youseong Kim, Hye Su Min, Jiwoo Shin, Jee Hye Nam, Geonwoo Kang, Mingyu Jang, Huisuk Yang and Hyungil Jung

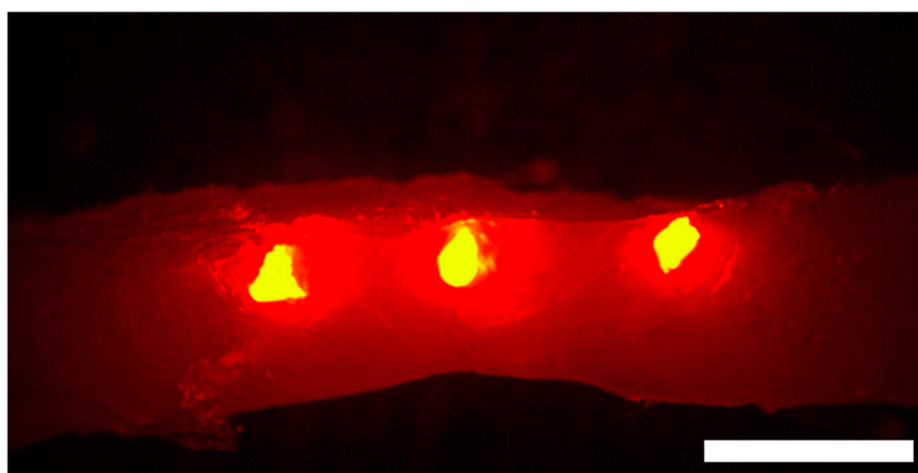

**Figure S1.** Fluorescence image of sectioned pig skin post HMP-DMN patch application. The HMP-DMN patch was fabricated with a dispensing time of 0.1 s and centrifugation time of 30 min. The PLGA mixture loaded with rhodamine B was successfully implanted inside the skin tissue. Scale bar: 1000  $\mu\text{m}$ . (HMP-DMN: heat-melt PLGA dissolving microneedle, PLGA: poly(lactic-co-glycolic acid)).
